# Supplementary material for: Bird Community Composition and Functional Guilds Response to Vegetation Structure in Southwest Ethiopia
Source: MDPI journal article supplement (doi:10.3390/f13122068), 2022-12-04
Supplement: s1 [file s1]

**Table S2:** The vegetation structure and number of plots sampled per patch. **Labels:** Nrtrees (number of trees), AvDBH (mean diameter at breast height), CrClosure (mean crown closure), CrCover (mean Crown cover), Havg (mean tree height), and Hmax (mean maximum tree height).

|         | Patch |         |       |       |            |          |      |       |
|---------|-------|---------|-------|-------|------------|----------|------|-------|
| Plot ID | ID    | Nrtrees | AvDBH | BA    | %CrClosure | %CrCover | Havg | Hmax  |
| P1      | 1     | 75      | 32.0  | 16.0  | 62.0       | 47.5     | 21.3 | 24.7  |
| P1      | 1     | 150     | 52.0  | 4.9   | 58.9       | 65.0     | 9.3  | 15.6  |
| P11     | 11    | 96      | 50.0  | 15.0  | 58.1       | 42.0     | 12.8 | 22.4  |
| P11     | 11    | 104     | 36.0  | 9.0   | 54.0       | 58.0     | 18.2 | 26.5  |
| P13     | 13    | 160     | 36.0  | 30.4  | 68.6       | 38.0     | 4.2  | 15.5  |
| P13     | 13    | 240     | 30.0  | 36.4  | 57.2       | 32.0     | 12.0 | 18.5  |
| P18     | 18    | 350     | 41.0  | 79.5  | 57.1       | 72.5     | 13.5 | 28.8  |
| P18     | 18    | 150     | 63.0  | 10.7  | 46.4       | 27.5     | 12.2 | 15.5  |
| P18     | 18    | 200     | 56.0  | 17.8  | 54.8       | 55.0     | 8.7  | 19.1  |
| P21     | 21    | 130     | 38.0  | 23.2  | 50.1       | 45.2     | 11.3 | 24.4  |
| P21     | 21    | 170     | 62.0  | 15.2  | 82.2       | 49.8     | 18.0 | 16.4  |
| P24     | 24    | 125     | 69.0  | 53.3  | 50.0       | 90.0     | 15.2 | 22.9  |
| P24     | 24    | 200     | 61.0  | 90.0  | 69.0       | 62.5     | 12.1 | 18.9  |
| P24     | 24    | 75      | 110.0 | 73.6  | 67.7       | 75.0     | 17.7 | 20.2  |
| P27     | 27    | 177     | 48.0  | 17.4  | 73.0       | 46.9     | 10.0 | 13.1  |
| P27     | 27    | 200     | 32.0  | 19.1  | 63.4       | 29.0     | 11.3 | 15.7  |
| P27     | 27    | 138     | 59.0  | 18.8  | 71.1       | 22.6     | 7.7  | 13.3  |
| P27     | 27    | 145     | 48.0  | 16.0  | 60.0       | 35.0     | 12.0 | 16.5  |
| P27     | 27    | 215     | 38.0  | 19.0  | 71.0       | 29.0     | 9.0  | 12.0  |
| P28     | 28    | 160     | 60.0  | 18.8  | 33.3       | 45.0     | 15.0 | 23.8  |
| P28     | 28    | 200     | 55.3  | 25.0  | 29.0       | 39.9     | 8.2  | 19.2  |
| P28     | 28    | 130     | 67.0  | 14.0  | 35.3       | 55.0     | 11.3 | 17.0  |
| P28     | 28    | 110     | 69.8  | 37.5  | 35.7       | 60.1     | 15.0 | 24.1  |
| P3      | 3     | 200     | 71.0  | 8.6   | 39.6       | 42.5     | 8.1  | 13.6  |
| P3      | 3     | 275     | 29.0  | 36.8  | 49.7       | 55.0     | 9.3  | 16.1  |
| P30     | 30    | 200     | 46.0  | 18.2  | 70.8       | 45.0     | 11.3 | 14.2  |
| P30     | 30    | 230     | 40.0  | 14.2  | 60.0       | 59.0     | 10.0 | 12.0  |
| P30     | 30    | 320     | 49.0  | 34.4  | 75.5       | 63.1     | 15.0 | 22.7  |
| P31     | 31    | 187     | 48.4  | 49.9  | 84.0       | 62.8     | 15.6 | 25.0  |
| P31     | 31    | 70      | 37.0  | 27.6  | 34.0       | 41.2     | 9.4  | 14.2  |
| P31     | 31    | 118     | 45.1  | 35.0  | 35.0       | 46.0     | 13.5 | 17.0  |
| P4      | 4     | 550     | 47.00 | 37.55 | 75.00      | 47.00    | 7.30 | 14.00 |
| P5      | 5     | 107     | 40.0  | 12.8  | 58.9       | 61.0     | 19.5 | 21.5  |
| P5      | 5     | 93      | 48.0  | 18.7  | 46.0       | 54.0     | 11.0 | 19.0  |
| P7      | 7     | 650     | 39.0  | 6.4   | 55.5       | 55.0     | 6.5  | 11.5  |
| P7      | 7     | 100     | 67.0  | 1.4   | 38.7       | 55.0     | 4.7  | 7.1   |
